# Supplementary material
Source: PubMed Central journal article supplement (PMC4086743)
Supplement: NIHMS607015-supplement-Supplement.pdf [file NIHMS607015-supplement-Supplement.pdf]

## Supplementary Information – Amino Acids:

### The canonical salt-bridge of the mouse $\alpha$ -defensin cryptdin-4 facilitates folding and resistance to proteolytic degradation

Håkan S. Andersson,<sup>c</sup> Sharel M. Figueredo,<sup>d</sup> Linda M. Haugaard-Kedström,<sup>c</sup> Elina Bengtsson,<sup>c</sup> Norelle L. Daly,<sup>b</sup> Xiaoqing Qu,<sup>d</sup> David J. Craik,<sup>b</sup> and André J. Ouellette,<sup>\*,d</sup> K. Johan Rosengren<sup>\*,a,c</sup>

The University of Queensland, <sup>a</sup>School of Biomedical Sciences and <sup>b</sup>Institute for Molecular Bioscience, Brisbane, QLD 4072, Australia. <sup>c</sup>School of Natural Sciences, Linnaeus University, SE 39182 Kalmar, Sweden. <sup>d</sup>Department of Pathology & Laboratory Medicine, Keck School of Medicine of USC, USC/Norris Cancer Center, Los Angeles, CA 90089-9601, U.S.A.

\*Address Correspondence to:

Dr. K.J. Rosengren. E-mail: [j.rosengren@uq.edu.au](mailto:j.rosengren@uq.edu.au) Prof. A.J. Ouellette. E-mail: [aouillet@usc.edu](mailto:aouillet@usc.edu)

**Supplementary Table 1:** Temperature coefficients for Crp4 and analogues

| Residue            | Crp4     |              | (E15D)-<br>Crp4 | (R7G)-<br>Crp4 | (E15G)-Crp4 | H-bond<br>acceptor |
|--------------------|----------|--------------|-----------------|----------------|-------------|--------------------|
|                    | Tc ppb/K | H/D<br>Exch. | Tc ppb/K        | Tc ppb/K       | Tc ppb/K    |                    |
| Leu 2              | ND*      |              | ND*             | ND*            | ND*         |                    |
| Leu 3              | -7.8     |              | -7.6            | -6.4           | -8.3        |                    |
| Cys 4              | -6.0     |              | -7.2            | -8.8           | -6.3        |                    |
| Tyr 5              | -7.6     | S            | -2.4            | -4.1           | -3.3        | 28 Cys O           |
| Cys 6              | -7.0     |              | -7.1            | -7.7           | -6.6        |                    |
| Arg/Gly 7          | -5.2     | S            | -5.8            | -1.3           | -6.0        | 26 Leu O           |
| Lys 8              | -5.1     |              | -4.9            | -4.3           | -4.3        |                    |
| Gly 9              | -5.9     |              | -6.5            | -4.3           | -7.0        |                    |
| His 10             | -3.9     |              | -5.4            | -3.8           | -4.7        | 8 Lys O            |
| Cys 11             | -8.3     |              | -9.0            | -8.7           | -4.9        |                    |
| Lys 12             | -2.5     |              | -4.9            | -1.4           | *           | 15 Glu OE          |
| Arg 13             | -9.1     |              | -7.6            | -9.0           | *           |                    |
| Gly 14             | -7.5     |              | -5.8            | -8.6           | *           |                    |
| Glu/Asp/<br>Gly 15 | -2.2     | S            | -2.1            | -1.5           | -4.1        | 12 Lys O           |
| Arg 16             | -4.7     | S            | -2.7            | -1.8           | -5.3        | 29 Cys O           |
| Val 17             | -6.9     |              | -7.4            | -6.7           | -7.7        |                    |
| Arg 18             | -5.5     | S            | -4.9            | -1.8           | -6.4        | 27 Tyr O           |
| Gly 19             | -3.7     |              | -2.6            | -4.3           | -2.7        | 27 Tyr O           |
| Thr 20             | -7.1     |              | -8.5            | -7.8           | *           |                    |
| Cys 21             | -1.3     |              | -3.0            | -0.7           | *           | 25 Phe O           |
| Gly 22             | -7.2     |              | -6.8            | -5.0           | *           |                    |
| Ile 23             | -5.0     |              | -4.4            | -5.4           | *           |                    |
| Arg 24             | -8.0     |              | -6.7            | -7.8           | *           |                    |
| Phe 25             | -5.7     |              | -4.5            | -3.6           | -5.5        | 22 Gly O           |
| Leu 26             | -4.1     | S            | -1.5            | -2.4           | -1.6        | 7 Arg O            |
| Tyr 27             | -1.4     | S            | -0.6            | -1.5           | -0.2        | 19 Gly O           |
| Cys 28             | -1.5     | S            | -2.0            | -2.1           | -1.1        | 5 Tyr O            |
| Cys 29             | -0.4     | S            | -2.1            | -4.6           | -1.3        | 16 Arg O           |
| Arg 31             | -5.6     |              | -8.3            | -7.8           | -6.8        |                    |
| Arg 32             | -6.0     |              | -5.6            | -6.8           | -6.2        |                    |

\*Could not be determined due to poor signal intensity.
